# Supplementary material
Source: PubMed Central journal article supplement (PMC3993427)
Supplement: IAI.01511-14_zii999090643so1.pdf [file IAI.01511-14_zii999090643so1.pdf]

# 1 SUPPLEMENTAL MATERIAL

## 2 Supplemental Methods

3 **Bacterial strain and growth conditions.** *T. denticola* ( $10^9$  cells per mL: grown in GM-1 broth  
4 for 48–72 h as a log phase culture) was mixed with equal volumes of sterile 4% (w/v) low-  
5 viscosity carboxymethylcellulose (CMC: Sigma, St. Louis, MO, USA) with PBS for oral  
6 infection inocula.

7 **Mouse infection.** Eight-week-old male ApoE<sup>null</sup> mice (The Jackson Laboratories, Bar Harbor,  
8 ME) were kept in groups and housed in microisolator cages. Mice were fed standard chow and  
9 water *ad libitum* and were randomly distributed into two groups before infection (Group1, *T.*  
10 *denticola* infection, n=24 mice. Group 2, sham-infected control, n=24 mice). Mice were  
11 administered kanamycin (500 µg/ml) for 3 days in the drinking water and the oral cavity was  
12 swabbed with 0.12% chlorhexidine gluconate (Peridex: 3M ESPE Dental Products, St. Paul,  
13 MN) mouth rinse to suppress the normal oral microbiota. *T. denticola*  $10^9$  cells were  
14 administered orally to mice for 4 days per week on every third week for eight infections. Oral  
15 plaque/microbial samples were taken from isoflurane anesthetized mice post-infection in 100µl  
16 TE (Tris-EDTA) buffer.

17 **Serum antibody analysis.** To provide additional confirmation of oral polymicrobial infection  
18 and to document an immunological response to *T. denticola* infection, we evaluated levels of the  
19 spirochete specific IgG and IgM against formalin-killed whole cells for *T. denticola* in sera from  
20 both *T. denticola*-infected and sham-infected mice. Briefly, diluted infected mouse serum (1:100)  
21 was incubated in wells of *T. denticola*-coated microtiter polystyrene plates (Costar, Corning, NY,  
22 USA) for 3 h at room temperature. After washing, alkaline phosphatase-conjugated goat anti-  
23 mouse IgG (1:5000) and IgM (1:5000) (Bethyl Laboratories, TX, USA) were added and

24 incubated for an additional 2 h at room temperature on a rotator. The substrate (p-  
25 nitrophenylphosphate; Sigma, 1mg/ml) was added to the washed plates, and the reaction was  
26 terminated by using 3M NaOH. The optical density (OD) was measured at OD<sub>405</sub> using a Bio-  
27 Rad Microplate Reader.

28 **Morphometric Analysis of Horizontal Alveolar Bone Resorption.** The 12- and 24-week  
29 microbial infected and control jaws (n=9 mice) were immersed in 3% (vol/vol) hydrogen  
30 peroxide over night and stained with 0.1% (wt/vol) methylene blue to delineate the cemento-  
31 enamel junction (CEJ) and alveolar bone crest (ABC) using a Zeiss SteREO Discovery.V8  
32 microscope and Zeiss AxioVision software version 4.8.2. Alveolar horizontal area bone  
33 resorption was determined by comparing the area between the CEJ and ABC in infected to sham-  
34 infected mice. Intrabony defect was determined by the presence or absence on the palatal and  
35 buccal sides of all three molars, and the percent was determined by dividing the number of  
36 intrabony defects by the total number of sites. Morphometric measurements represent the  
37 average alveolar bone resorption determined by three independent viewers blinded to the mice  
38 groups.

39 **Histomorphometric Analysis of Aortic Atherosclerotic Plaque.** Hearts and aortas harvested  
40 at euthanasia of mice were fixed in 10% neutral buffered formalin, embedded in paraffin, and cut  
41 into 5 um sections for Haematoxylin and Eosin (H&E) staining. The aorta at the level of the  
42 aortic valve, where atherosclerotic plaque predominates in ApoE<sup>null</sup> mice, and in the ascending  
43 aorta was examined for plaque by cutting six up to eleven 5µm sections at 50-100 micron length  
44 intervals along the aorta from the ascending aorta to the level of the aortic valve, allowing  
45 confirmation of presence or absence of atherosclerotic plaque (12-22 sections per aorta per  
46 mouse). The two sections with largest plaque areas for each mouse aorta were used for all

47 subsequent analyses ensuring that the largest plaques detected were used for all subsequent  
48 analysis. The aortic arch and descending thoracic and abdominal aorta were also sectioned but  
49 had minimal if any visible plaque. Plaque area and also intimal and medial thickness were  
50 measured, and/or calculated, by two blinded viewer's using an Olympus DP71 microscope and  
51 ImagePro MC 6.0 software, with calibration to microscopic objective. Plaque area and  
52 calculated intimal/medial thickness ratios provide differing measures of atherosclerotic plaque  
53 size, intimal/medial thickness ratios providing a correction for potential significant variations in  
54 aortic size and diameter at differing aortic anatomic levels.

55 **Fluorescence *in situ* hybridization (FISH).** The protocol was modified from Fuchs 2007 (1)  
56 and Mantz 1999 (2). Tissue sections on slides were deparaffinized in decreasing concentrations  
57 of xylene and ethanol. Samples were blocked with Denhardt's reagent (Fisher) and covered with  
58 hybridization solution (900mM NaCl, 20mM Tris-HCl pH 7.5, 0.01% SDS, 20% formamide)  
59 containing 5µg/ml probe, and incubated for 3 hours at 50°C. The probe was rinsed off and  
60 incubated in wash buffer (20mM Tris-HCl, pH7.5, 5mM EDTA, 0.01% SDS, 0.225M NaCl), at  
61 48°C for 25 min. Blocking buffer, hybridization buffer, and wash buffer all contained  
62 protectRNA (Sigma-Aldrich) to protect bacterial RNA from degradation. Tissues were counter-  
63 stained with DRAQ5 and mounted in mowiol. Slides were dried overnight before being viewed  
64 with a fluorescence microscope. Images were taken using a spinning disk confocal system  
65 connected to a Leica DMIRB microscope with a 63× oil immersion objective equipped with a  
66 Photometrics cascade-cooled EMCCD camera under the control of the open-source software  
67 package µManager (<http://www.micro-manager.org/>). Confocal images were processed using  
68 ImageJ software (NCBI).

69       **Determination of serum amyloid A (SAA) in ApoE<sup>null</sup> mice.** The SAA ELISA kit contained  
70 pre-coated plates containing bound anti-SAA antibody that was used both for calibrations and  
71 samples. All procedures were performed at room temperature. Diluted (1:100) serum samples  
72 were added to pre-coated plate and incubated for 1 h. After the wells were washed with a  
73 washing solution from the kit, Enzyme-Antibody Conjugate was added and plate was incubated  
74 for 30 min. After another wash TMB substrate solution from the kit was added and incubated for  
75 10 min. The reaction was stopped using the stop solution contained in the kit. Absorbance was  
76 determined at OD<sub>450</sub> using a Bio-Rad Microplate Reader. A second order polynomial calibration  
77 curve was made using the standards contained in the kit and the data were analyzed for statistical  
78 significance by Mann-Whitney t-test.

79       **Determination of serum lipoprotein in ApoE<sup>null</sup> mice.** Sera were obtained from the blood  
80 collected from the cardiac puncture of each mouse at the time of euthanasia and used to  
81 determine serum lipoproteins (chylomicrons, VLDL, LDL, HDL), serum cholesterol, and  
82 triglyceride profiles by high-pressure liquid chromatography which is based on the gel  
83 permeation principle using the method of Liposearch at skylight biotech, Japan.

84       **Mouse atherosclerosis RT<sup>2</sup> Profiler PCR array.** Atherosclerosis-related gene profiles were  
85 evaluated using RT<sup>2</sup> Profiler Mouse Atherosclerosis PCR Array. Briefly, tissues were  
86 mechanically disrupted using homogenized using a mechanical tissueRuptor (QIAGEN,  
87 Valencia, CA) and RNA was extracted using an RNeasy kit (QIAGEN, Valencia, CA), followed  
88 by reverse transcription with the RT<sup>2</sup> First Strand Kit (QIAGEN, Valencia, CA). RNA samples  
89 were prepared for array with the SYBR Green Master mix (QIAGEN, Valencia, CA). QPCR  
90 Cycling was performed according to the manufacturer's protocol, and data were analyzed using  
91 the PCR Array Data Analysis V4 excel worksheet.

92       **Evaluation of inflammatory cytokine array in mouse serum.** Inflammatory cytokines in  
93 mouse serum were evaluated using a Ray Biotech Mouse Inflammatory Cytokine glass chip  
94 Array. Fluorescent signals were detected using a GenePix 4400 scanner. The RayBio Analysis  
95 tool excel sheet was used for analysis. Fold difference in expression was plotted vs. median  
96 fluorescence intensity (MFI) value of sham-infected mice for each cytokine and important  
97 clusters of cytokines up- or down-regulated were determined based on the position in the graph  
98 and interactions with other affected genes.

99       **Statistical Analysis.** Graph Pad Prism software v.5 was used to perform statistical analyses of  
100 bacterial-specific serum antibody levels, serum lipid profiles, SAA, NO, and alveolar bone  
101 resorption by a two-tailed Student's t test. The alveolar bone resorption and antibody analysis  
102 data are presented as means  $\pm$  standard deviations. Aortic plaque histology measurements were  
103 analyzed by analysis of variance (ANOVA) with the Statview program and *post hoc* Fisher's  
104 PLSD analysis, with bar graphs represented as mean  $\pm$  standard error. In all analyses, *p* values  
105 less than 0.05 were considered statistically significant.

#### 106 **Supplemental References**

- 107       1. **Fuchs BM, Pernthaler J, Amann R.** Single Cell Identification by Fluorescence *In Situ*  
108       Hybridization. 2007. *Methods for General and Molecular Microbiology* (3rd Edition).  
109       886–896.
- 110       2. **Manz W.** 1999. *In situ* Analysis of Microbial Biofilms by rRNA-Targeted  
111       Oligonucleotide Probing. *Methods in Enzymology*. **310**: 79–91.

112 Table 1. Distribution of oral microbial samples positive for *T. denticola* by PCR

---

|                     |                                                          |
|---------------------|----------------------------------------------------------|
| Bacterial infection | Positive oral microbial sample for bacterial genomic DNA |
|---------------------|----------------------------------------------------------|

---

| Sampling *                    | 1 | 2  | 3 | 4 | 5  | 6 | 7  | 8  |
|-------------------------------|---|----|---|---|----|---|----|----|
| <i>T. denticola</i> infected† | 4 | 12 | 0 | 0 | 11 | 0 | 11 | 11 |
| Sham-infected‡                | 0 | 0  | 0 | 0 | 0  | 0 | 0  | 0  |

113 \* Number of mice sampled from 1-4<sup>th</sup> sampling was 24, while number of mice sampled from 5-  
114 8<sup>th</sup> sampling was 12. †Mice were infected with *T. denticola* for 8 alternate weeks. Samples were  
115 analyzed using *T. denticola* species-specific primers with positive and negative controls. ‡Oral  
116 microbial samples were collected from sham-infected control mice periodically and examined  
117 for *T. denticola* using bacteria-specific primers and all mice were negative.
